# Supplementary material for: New unsymmetrical donor dimethyl(ethylenedioxy)tetraselenafulvalene (DMEDO-TSeF): Structures and properties of its cation radical salts
Source: Royal Society of Chemistry journal article supplement (doi:10.1039/b511820d), 2005-01-01
Supplement: b511820d.pdf [file b511820d.pdf]

## Electronic Supplementary Information (ESI) service

*New unsymmetrical donor dimethyl(ethylenedioxy)tetraselenafulvalene (DMEDO-TSeF): structures and properties of its cation radical salts*

**Takashi Shirahata, Megumi Kibune and Tatsuro Imakubo**

*Imakubo Initiative Research Unit, RIKEN, 2-1 Hirosawa, Wako, Saitama 351-0198, Japan.*

*E-mail: tsirahat@riken.jp, imakubo@riken.jp*

### **Synthesis**

#### **Dimethyl(ethylenedioxy)tetraselenafulvalene (DMEDO-TSeF)**

To a mixture of selone **1** (226 mg, 0.68 mmol) and selone **2** (215 mg, 0.71 mmol) in benzene (90 ml) was added hexamethylphosphorous triamide (HMPT 0.74 ml, 4.08 mmol), and the solution was stirred for 2 hours under argon atmosphere. After the removal of the solvent under reduced pressure, the crude products were separated by column chromatography (SiO<sub>2</sub>/CS<sub>2</sub>-CH<sub>2</sub>Cl<sub>2</sub>) and then purified by preparative gel permeation chromatography (GPC/CS<sub>2</sub>). The target DMEDO-TSeF was isolated as purple red needles (31 mg, 0.065 mmol, 10%) together with the self-coupling products TMTSF (12.5 mg, 0.028 mmol, 8%) and BEDO-TSeF (18.7 mg, 0.0368 mmol, 11%).

**DMEDO-TSeF:** mp 199 °C (decomp.); *m/z* (EI, 70 eV): 480 (M<sup>+</sup> for C<sub>10</sub>H<sub>10</sub>O<sub>2</sub><sup>78</sup>Se<sup>80</sup>Se<sub>3</sub>); δ<sub>H</sub> (270 MHz, CD<sub>2</sub>Cl<sub>2</sub>) 4.27 (4H, s, OCH<sub>2</sub>CH<sub>2</sub>O), 2.00 (6H, s, CH<sub>3</sub>); IR (neat, ν/cm<sup>-1</sup>) 1624 (s), 1443 (m), 1368 (m), 1268 (m), 1240 (w), 1134 (s); Elemental analysis: Calc. for C<sub>10</sub>H<sub>10</sub>O<sub>2</sub>Se<sub>4</sub>: C, 25.13; H, 2.11. Found: C, 25.14; H, 2.11%.

## ***X-ray crystal structure analysis for neutral DMEDO-TSeF***

CCDC reference number is 281659

Table 1. Crystal data and structure refinement for DMEDO-TSeF.

|                                             |                                                                   |                              |
|---------------------------------------------|-------------------------------------------------------------------|------------------------------|
| Empirical formula                           | $C_{10}H_{10}O_2Se_4$                                             |                              |
| Formula weight                              | 478.02                                                            |                              |
| Temperature                                 | 293 K                                                             |                              |
| Wavelength                                  | 0.71073 Å                                                         |                              |
| Crystal system                              | <i>Monoclinic</i>                                                 |                              |
| Space group                                 | $P2_1/c$ (#14)                                                    |                              |
| Unit cell dimensions                        | $a = 13.958(4)$ Å                                                 | $\alpha = 90^\circ$ .        |
|                                             | $b = 8.285(2)$ Å                                                  | $\beta = 109.478(6)^\circ$ . |
|                                             | $c = 11.867(3)$ Å                                                 | $\gamma = 90^\circ$ .        |
| Volume                                      | $1293.8(6)$ Å <sup>3</sup>                                        |                              |
| <i>Z</i>                                    | 4                                                                 |                              |
| Density (calculated)                        | $2.454$ Mg/m <sup>3</sup>                                         |                              |
| Absorption coefficient                      | $11.323$ mm <sup>-1</sup>                                         |                              |
| <i>F</i> (000)                              | 888                                                               |                              |
| Crystal size                                | $0.50 \times 0.06 \times 0.05$ mm <sup>3</sup>                    |                              |
| Theta range for data collection             | $1.55$ to $28.48^\circ$ .                                         |                              |
| Index ranges                                | $-16 \leq h \leq 18$ , $-9 \leq k \leq 11$ , $-15 \leq l \leq 15$ |                              |
| Reflections collected                       | 9395                                                              |                              |
| Independent reflections                     | 3223 ( $R_{int} = 0.0571$ )                                       |                              |
| Completeness to theta = $28.48^\circ$       | 98.9 %                                                            |                              |
| Absorption correction                       | Empirical (SADABS; Sheldrick 1996)                                |                              |
| Max. and min. transmission                  | 0.6013 and 0.0703                                                 |                              |
| Refinement method                           | Full-matrix least-squares on $F^2$                                |                              |
| Data / restraints / parameters              | 3223 / 0 / 147                                                    |                              |
| Goodness-of-fit on $F^2$                    | 1.076                                                             |                              |
| Final <i>R</i> indices [ $I > 2\sigma(I)$ ] | $R_1 = 0.0501$ , $wR_2 = 0.1262$                                  |                              |
| <i>R</i> indices (all data)                 | $R_1 = 0.0790$ , $wR_2 = 0.1405$                                  |                              |
| Largest diff. peak and hole                 | $0.718$ and $-0.792$ e Å <sup>-3</sup>                            |                              |

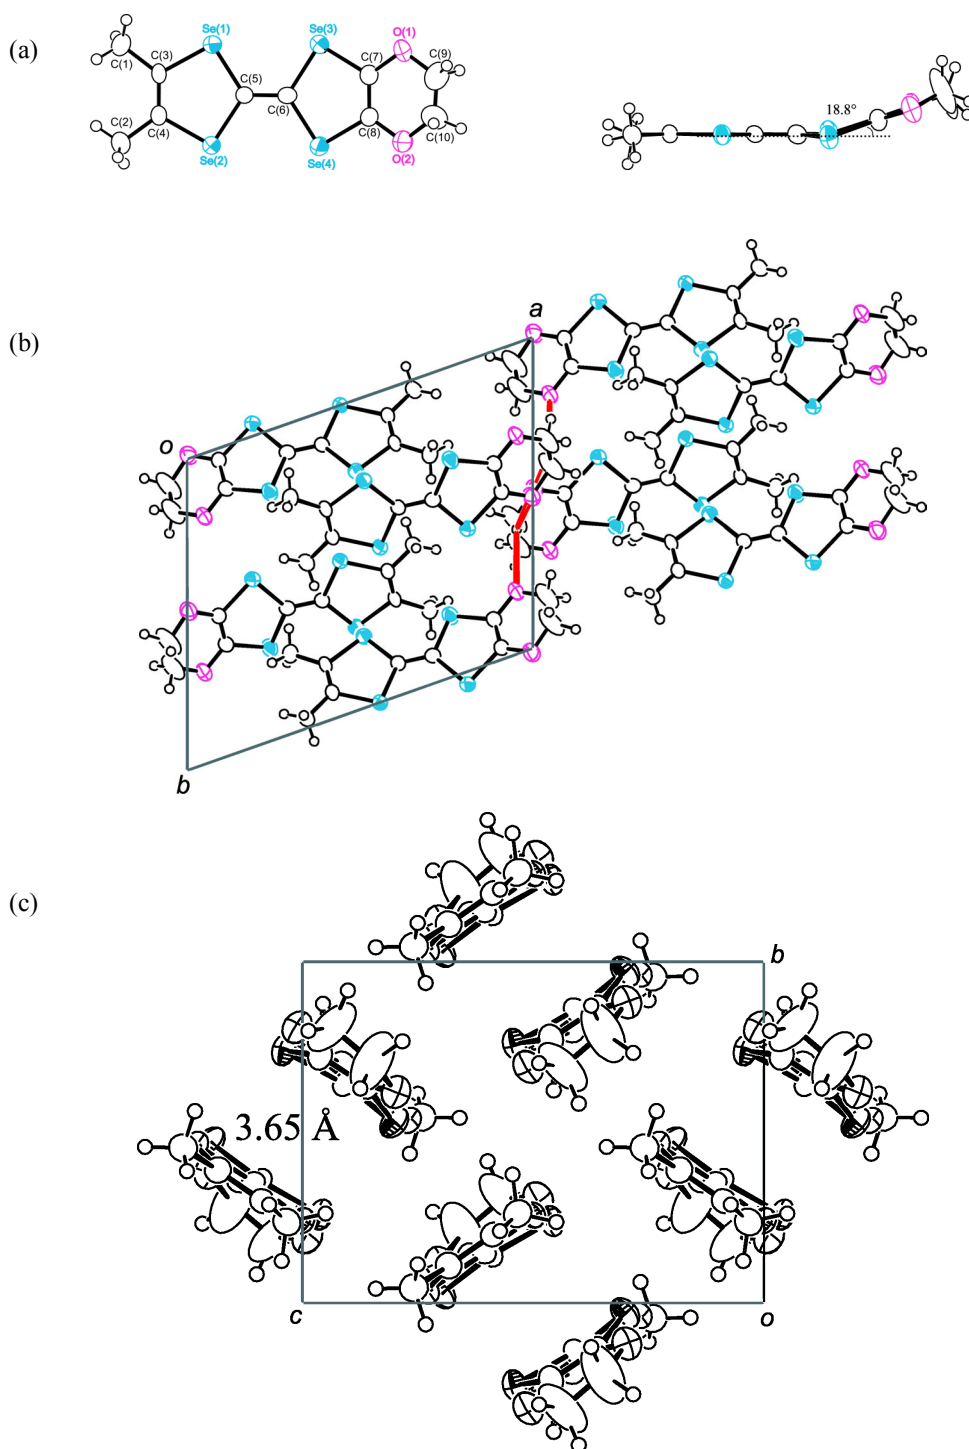

**Fig. 1** Crystal structure of DMEDO-TSeF: (a) molecular structures; (b) crystal packing diagram viewed along the crystallographic *c*-axis, the orange line indicate short CH...O contacts shorter than 3.0 Å; (c) κ-type layer structure viewed along the crystallographic *a*-axis.

## Band calculation

Intermolecular overlap integrals were calculated using HOMOs of the donor molecules obtained by the extended Hückel MO calculations using semiempirical parameters for the  $s$  and  $p$  Slater-type atomic orbitals listed in Table 3. The transfer integral ( $t$ ) is approximately in proportion to the overlap integral ( $S$ ),  $t = \epsilon S$  ( $\epsilon = -10$  eV;  $\epsilon$  is a constant with order of the orbital energies of HOMOs). The electronic band dispersions and Fermi surfaces were calculated using the intermolecular overlap integrals under the tight-binding approximation.<sup>1</sup>

<sup>1</sup> T. Mori, A. Kobayashi, Y. Sasaki, H. Kobayashi, G. Saito and H. Inokuchi, *Bull. Chem. Soc. Jpn.*, 1984, **57**, 627; M.-H. Whangbo, J. M. Williams, P. C. W. Leung, M. A. Beno, T. J. Emge, H. H. Wang, K. D. Carlson and G. W. Crabtree, *J. Am. Chem. Soc.*, 1985, **107**, 5815.

**Table 2** Calculated overlap integrals  $S$  ( $\times 10^{-3}$ ) for (DMEDO-TSeF)<sub>2</sub>X (X = PF<sub>6</sub>, AsF<sub>6</sub> and SbF<sub>6</sub>)

|   | PF <sub>6</sub> | AsF <sub>6</sub> | SbF <sub>6</sub> |
|---|-----------------|------------------|------------------|
| p | -26.49          | -21.28           | -20.82           |
| q | -27.06          | -22.50           | -22.03           |
| r | -0.28           | -1.71            | -0.84            |
| s | -2.22           | 0.51             | 3.81             |
| t | -0.68           | 0.26             | 1.69             |

**Table 3** Semi-empirical parameters for Slater-type orbitals

| orbitals | $\zeta$ | $I_p / \text{Ry}$ |
|----------|---------|-------------------|
| Se 4s    | 2.44    | -1.40             |
| Se 4p    | 2.07    | -0.74             |
| O 2s     | 2.275   | -2.375            |
| O 2p     | 2.275   | -1.088            |
| C 2s     | 1.625   | -1.573            |
| C 2p     | 1.625   | -0.838            |
| H 1s     | 1.30    | -1.0              |

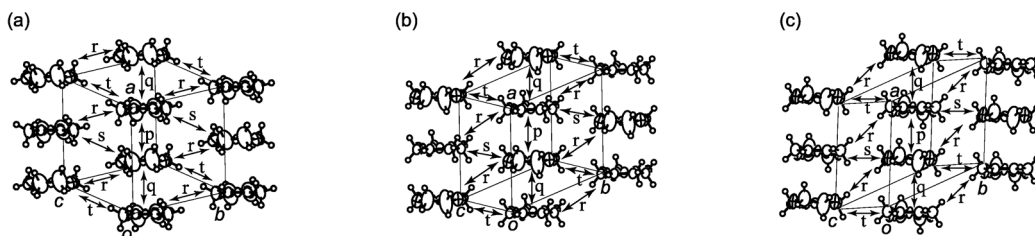

**Fig. 2** Donor arrangement of (DMEDO-TSeF)<sub>2</sub>X; (a) X = PF<sub>6</sub>, (b) X = AsF<sub>6</sub> and (c) X = SbF<sub>6</sub>.

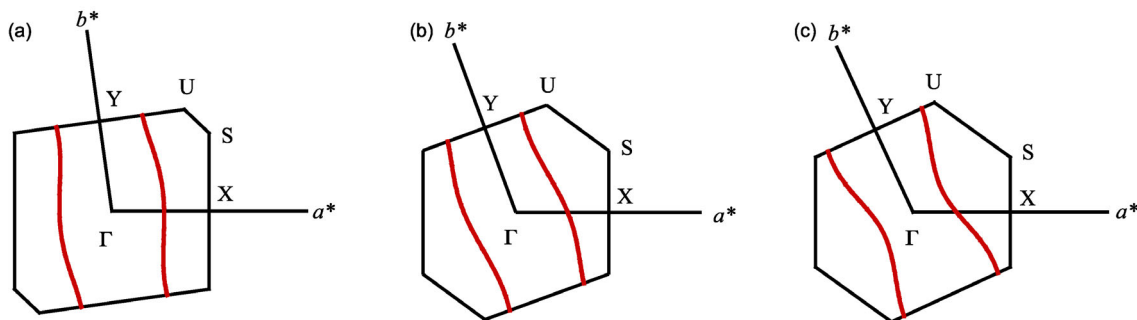

**Fig. 3** Calculated Fermi surfaces of (DMEDO-TSeF)<sub>2</sub>X; (a) X = PF<sub>6</sub>, (b) X = AsF<sub>6</sub> and (c) X = SbF<sub>6</sub>.
